# Supplementary material
Source: Research Square preprint supplement (doi:10.21203/rs.3.rs-9260183/v1)
Supplement: Supplementary file 1 [file bbf2d284db3fc81d653a4481.pdf]

# Supporting Information

## Transport Limitations and Defect-Mediated Recombination in Lead-Free Double Perovskite $\text{Cs}_2\text{AgSbI}_6$ : Implications for Solar-Cell Design

Mohamed Bouzidi <sup>1</sup>, Abdullah A. Alatawi <sup>2</sup>, Turki Alkathiri <sup>3</sup>, Sultan Albarakati <sup>4</sup>, Norah Alwadai <sup>5</sup>, Ahmed F. Almutairi <sup>6</sup>, Refka Ghodhban <sup>7</sup>, Mohamed Ben Bechir <sup>8,9,\*</sup>

<sup>1</sup> Department of Physics, College of Science, University of Ha'il, Ha'il P.O. Box 2440, Saudi Arabia

<sup>2</sup> King Abdulaziz City for Science and Technology, P.O. Box 6086, Riyadh 11442, Saudi Arabia

<sup>3</sup> Department of Electrical Engineering, College of Engineering, Al-Baha University, Albaha, P.O. Box 65799, Saudi Arabia

<sup>4</sup> Department of Physics, College of Science, University of Jeddah, Jeddah, Saudi Arabia

<sup>5</sup> Department of Physics, College of Science, Princess Nourah bint Abdulrahman University, P.O. Box 84428, Riyadh 11671, Saudi Arabia

<sup>6</sup> Department of Mechanical Engineering, College of Engineering at Yanbu, Taibah University, Yanbu Al-Bahr 41911, Saudi Arabia

<sup>7</sup> Center for Scientific Research and Entrepreneurship, Northern Border University, Arar 73213, Saudi Arabia

<sup>8</sup> Laboratory of Spectroscopic and Optical Characterization of Materials (LaSCOM), Faculty of Sciences, University of Sfax, Sfax, Tunisia

<sup>9</sup> Department of Physics, Faculty of Sciences of Gafsa, University of Gafsa, 2112, Tunisia.

\* Corresponding author. E-mail address : [mohamedbenbechir@hotmail.com](mailto:mohamedbenbechir@hotmail.com)

### S1. Supplementary Figures

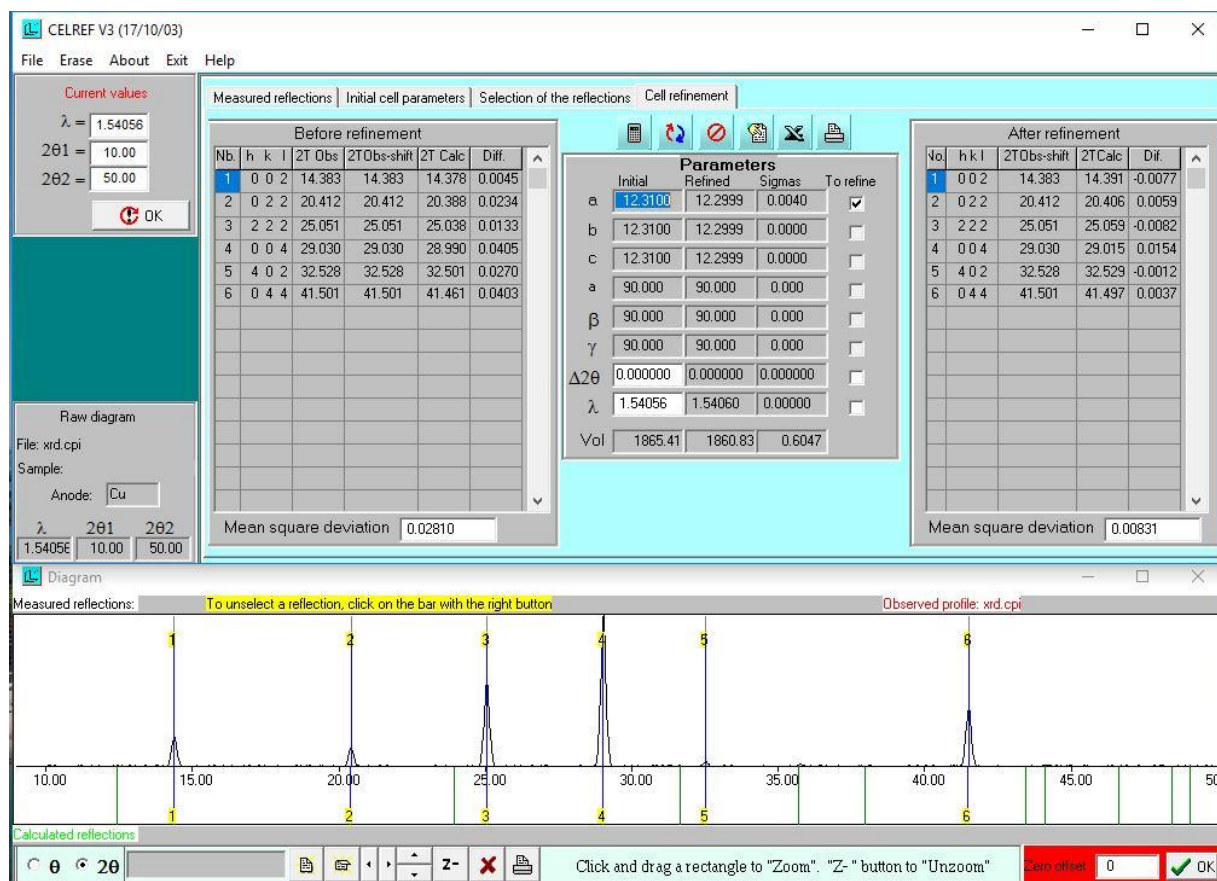

**Figs. S1.** CELREF refinement of the room-temperature X-ray diffraction pattern of polycrystalline  $\text{Cs}_2\text{AgSbI}_6$  assuming a cubic double-perovskite structure.

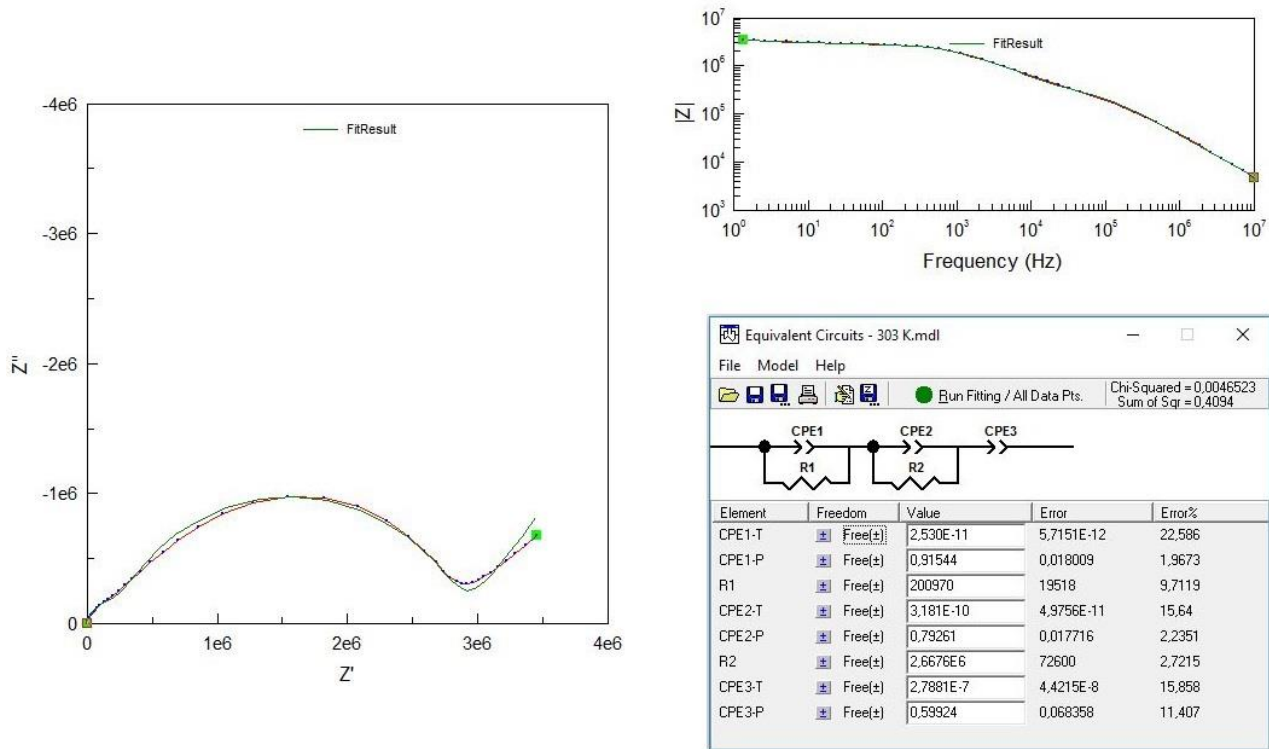

**Figs. S2.** Representative impedance spectrum of polycrystalline  $\text{Cs}_2\text{AgSbI}_6$  measured at 303 K under dark conditions together with the corresponding equivalent-circuit fitting.

## S2. SCAPS-1D simulation methodology and input parameters

numerical simulations were performed using SCAPS-1D version 3.3.09 (ELIS–UGent). The simulated device architecture corresponds to:

FTO /  $\text{TiO}_2$  /  $\text{Cs}_2\text{AgSbI}_6$  / Spiro-OMeTAD / metal contact

All simulations were carried out at 300 K under AM1.5G illumination ( $1000 \text{ W m}^{-2}$ ) unless otherwise stated. The simulations were designed to translate experimentally observed bulk recombination and transport limitations into a device-level framework, rather than to model an optimized photovoltaic device.

### S3. Bulk material parameters

**Table S1.** SCAPS-1D input parameters for Spiro-OMeTAD (HTL)

| Parameter           | Symbol       | Value              | Unit                                      |
|---------------------|--------------|--------------------|-------------------------------------------|
| Thickness           | d            | 200                | nm                                        |
| Band gap            | $E_g$        | 3.0                | eV                                        |
| Electron affinity   | $\chi$       | 2.4                | eV                                        |
| Dielectric constant | $\epsilon_r$ | 3.0                | —                                         |
| Electron mobility   | $\mu_n$      | $2 \times 10^{-4}$ | $\text{cm}^2 \text{V}^{-1} \text{s}^{-1}$ |
| Hole mobility       | $\mu_p$      | $2 \times 10^{-4}$ | $\text{cm}^2 \text{V}^{-1} \text{s}^{-1}$ |
| Acceptor density    | $N_A$        | $1 \times 10^{18}$ | $\text{cm}^{-3}$                          |
| Donor density       | $N_D$        | 0                  | $\text{cm}^{-3}$                          |

**Table S2.** SCAPS-1D input parameters for  $\text{Cs}_2\text{AgSbI}_6$  absorber

| Parameter           | Symbol       | Value              | Unit                                      |
|---------------------|--------------|--------------------|-------------------------------------------|
| Thickness           | d            | 600                | nm                                        |
| Band gap            | $E_g$        | 1.65               | eV                                        |
| Electron affinity   | $\chi$       | 4.0                | eV                                        |
| Dielectric constant | $\epsilon_r$ | 10.0               | —                                         |
| Electron mobility   | $\mu_n$      | 1.0                | $\text{cm}^2 \text{V}^{-1} \text{s}^{-1}$ |
| Hole mobility       | $\mu_p$      | 0.5                | $\text{cm}^2 \text{V}^{-1} \text{s}^{-1}$ |
| Acceptor density    | $N_A$        | $1 \times 10^{15}$ | $\text{cm}^{-3}$                          |
| Donor density       | $N_D$        | 0                  | $\text{cm}^{-3}$                          |

|                     |          |                                       |                  |
|---------------------|----------|---------------------------------------|------------------|
| Bulk defect density | $N_t$    | $5 \times 10^{18} - 1 \times 10^{20}$ | $\text{cm}^{-3}$ |
| Defect type         | –        | Neutral                               | –                |
| Defect energy level | $E_t$    | $E_c - 0.10$                          | eV               |
| Electron lifetime   | $\tau_n$ | 0.01                                  | ns               |
| Hole lifetime       | $\tau_p$ | 0.01                                  | ns               |

**Table S3.** SCAPS-1D input parameters for TiO<sub>2</sub> (ETL)

| Parameter           | Symbol       | Value              | Unit                                      |
|---------------------|--------------|--------------------|-------------------------------------------|
| Thickness           | d            | 50                 | nm                                        |
| Band gap            | $E_g$        | 3.2                | eV                                        |
| Electron affinity   | $\chi$       | 4.0                | eV                                        |
| Dielectric constant | $\epsilon_r$ | 9.0                | –                                         |
| Electron mobility   | $\mu_n$      | 10                 | $\text{cm}^2 \text{V}^{-1} \text{s}^{-1}$ |
| Hole mobility       | $\mu_p$      | $1 \times 10^{-4}$ | $\text{cm}^2 \text{V}^{-1} \text{s}^{-1}$ |
| Donor density       | $N_D$        | $1 \times 10^{18}$ | $\text{cm}^{-3}$                          |

**Table S4.** SCAPS-1D input parameters for FTO (TCO)

| Parameter           | Symbol       | Value | Unit |
|---------------------|--------------|-------|------|
| Thickness           | d            | 500   | nm   |
| Band gap            | $E_g$        | 3.5   | eV   |
| Electron affinity   | $\chi$       | 4.0   | eV   |
| Dielectric constant | $\epsilon_r$ | 9.0   | –    |

|                   |         |                    |                                           |
|-------------------|---------|--------------------|-------------------------------------------|
| Electron mobility | $\mu_n$ | 20                 | $\text{cm}^2 \text{V}^{-1} \text{s}^{-1}$ |
| Donor density     | $N_D$   | $1 \times 10^{20}$ | $\text{cm}^{-3}$                          |

### S3. Interface defect parameters

**Table S5.** Interface defect states

| Interface                                       | $N_t$              | Unit             | $E_t$ | $S_n = S_p$                       |
|-------------------------------------------------|--------------------|------------------|-------|-----------------------------------|
| Spiro-OMeTAD<br>/ $\text{Cs}_2\text{AgSbI}_6$   | $1 \times 10^{14}$ | $\text{cm}^{-2}$ | $E_i$ | $1 \times 10^4 \text{ cm s}^{-1}$ |
| $\text{Cs}_2\text{AgSbI}_6$ /<br>$\text{TiO}_2$ | $1 \times 10^{12}$ | $\text{cm}^{-2}$ | $E_i$ | $1 \times 10^2 \text{ cm s}^{-1}$ |

All interface states were assumed neutral with single-level energy distributions.

### S4. Contact parameters

**Table S6.** Electrical contact properties

| Contact                                  | Work function (eV) | Electron SRV ( $\text{cm s}^{-1}$ ) | Hole SRV ( $\text{cm s}^{-1}$ ) |
|------------------------------------------|--------------------|-------------------------------------|---------------------------------|
| Back contact (metal /<br>Spiro-OMeTAD)   | 5.1                | $1 \times 10^5$                     | $1 \times 10^7$                 |
| Front contact (FTO /<br>$\text{TiO}_2$ ) | 4.4                | $1 \times 10^7$                     | $1 \times 10^5$                 |

Ohmic contacts were intentionally assumed to isolate bulk and interfacial recombination effects from contact-limited transport.

### S5. Numerical and measurement conditions (Action Panel settings)

The current–voltage characteristics were calculated using the following numerical settings:

- Temperature: 300 K
- Illumination spectrum: AM1.5G ( $1000 \text{ W m}^{-2}$ )
- Voltage scan range:  $-0.20 \text{ V}$  to  $+1.20 \text{ V}$
- Voltage step:  $0.01 \text{ V}$

- Number of points: 141
- Series resistance:  $R_s = 10 \Omega \cdot \text{cm}^2$
- Shunt resistance:  $R_{sh} = 1 \times 10^{30} \Omega \cdot \text{cm}^2$
- Radiative and Auger recombination: neglected
- Recombination mechanism: Shockley–Read–Hall (SRH)

Dark and illuminated conditions were simulated using identical numerical settings, except for the illumination source.

## **S6. Reproducibility statement**

All figures reported in the main manuscript were generated using the parameters summarized above. The Supplementary Information provides full numerical transparency to ensure reproducibility and facilitate comparison with future experimental and simulation studies.
